# Supplementary material for: Mental Health Treatment Delay: A Comparison Among Civilians and Veterans of Different Service Eras
Source: Atypon-hosted journal article supplement (doi:10.1176/appi.ps.201800444), 2019-03-07
Supplement: appi.ps.201800444.ds001.pdf [file appi.ps.201800444.ds001.pdf]

Supplemental Table 1. Treatment types by disorder

| Disorder | NESARC-III Item                                                                                      | Help Category |
|----------|------------------------------------------------------------------------------------------------------|---------------|
| PTSD     | Ever go to any kind of counselor/therapist/doctor to get help for PTSD                               | Formal        |
| PTSD     | Ever go to any kind of self-help group to get help for PTSD                                          | Informal      |
| PTSD     | Ever a patient in hospital overnight because of PTSD                                                 | Formal        |
| PTSD     | Ever go to emergency room for help with PTSD                                                         | Formal        |
| PTSD     | Doctor ever prescribe medicines/drugs to help with PTSD                                              | Formal        |
| MDD      | Went to counselor/therapist/doctor/other person for help to improve mood                             | Formal        |
| MDD      | Went to self-help or support group, used a hotline for help to improve mood                          | Informal      |
| MDD      | Stayed overnight in hospital because of depression                                                   | Formal        |
| MDD      | Went to emergency room for help because of depression                                                | Formal        |
| MDD      | Doctor prescribed medicine/drug to improve mood                                                      | Formal        |
| AUD      | Ever went to Alcoholics/Narcotics/Cocaine Anonymous, or 12-step meeting                              | Informal      |
| AUD      | Ever went to family services or other social service agency                                          | Formal        |
| AUD      | Ever went to alcohol/drug detoxification ward/clinic                                                 | Formal        |
| AUD      | Ever went to inpatient ward of psychiatric/general hospital or community mental health program       | Formal        |
| AUD      | Ever went to outpatient clinic, including outreach and day/partial patient program                   | Formal        |
| AUD      | Ever went to alcohol/drug rehabilitation program                                                     | Formal        |
| AUD      | Ever went to emergency room because of drinking                                                      | Formal        |
| AUD      | Ever went to halfway house/therapeutic community                                                     | Formal        |
| AUD      | Ever went to crisis center because of drinking                                                       | Formal        |
| AUD      | Ever went to employee assistance program (EAP)                                                       | Formal        |
| AUD      | Ever went to clergyman, priest or rabbi because of drinking                                          | Informal      |
| AUD      | Ever went to private physician, psychiatrist, psychologist, social worker, or any other professional | Formal        |
| AUD      | Ever went to any other agency or professional                                                        | Formal        |

Note: PTSD = post-traumatic stress disorder; MDD = major depressive disorder; AUD = alcohol-use disorder.

Supplemental Table 2. Likelihood of treatment seeking predicted by veteran status and demographic variables

| Predictor              | PTSD        |                  | MDD         |                  | AUD         |                  |
|------------------------|-------------|------------------|-------------|------------------|-------------|------------------|
|                        | AOR         | 95% CI           | AOR         | 95% CI           | AOR         | 95% CI           |
| <b>Veteran status</b>  |             |                  |             |                  |             |                  |
| <b>Specification 1</b> |             |                  |             |                  |             |                  |
| Post-9/11 veteran      | Ref         |                  | Ref         |                  | Ref         |                  |
| Civilian               | <b>.31</b>  | <b>.15-.62</b>   | <b>.47</b>  | <b>.26-.84</b>   | 1.12        | .74-1.70         |
| Pre-9/11 veteran       | .55         | .24-1.25         | .61         | .32-1.15         | 1.18        | .75-1.86         |
| <b>Specification 2</b> |             |                  |             |                  |             |                  |
| Civilian               | Ref         |                  | Ref         |                  | Ref         |                  |
| Post-9/11 veteran      | <b>3.25</b> | <b>1.61-6.55</b> | <b>2.14</b> | <b>1.19-3.83</b> | .89         | .59-1.35         |
| Pre-9/11 veteran       | <b>1.79</b> | <b>1.10-2.90</b> | 1.30        | .98-1.72         | 1.05        | .85-1.30         |
| Male gender            | <b>.75</b>  | <b>.58-.95</b>   | <b>.50</b>  | <b>.44-.58</b>   | <b>1.46</b> | <b>1.28-1.66</b> |
| <b>Age</b>             |             |                  |             |                  |             |                  |
| 18-29                  | Ref         |                  | Ref         |                  | Ref         |                  |
| 30-44                  | <b>1.40</b> | <b>1.06-1.86</b> | <b>1.65</b> | <b>1.40-1.95</b> | <b>1.64</b> | <b>1.37-1.96</b> |
| 45-64                  | 1.21        | .92-1.60         | <b>1.71</b> | <b>1.44-2.02</b> | <b>2.47</b> | <b>2.06-2.95</b> |
| 65+                    | <b>.60</b>  | <b>.40-.90</b>   | 1.21        | .97-1.51         | <b>1.87</b> | <b>1.41-2.47</b> |
| <b>Race/ethnicity</b>  |             |                  |             |                  |             |                  |
| White, NH              | Ref         |                  | Ref         |                  | Ref         |                  |
| Black, NH              | <b>.51</b>  | <b>.39-.65</b>   | <b>.40</b>  | <b>.34-.46</b>   | 1.00        | .85-1.18         |
| Other, NH              | .78         | .50-1.21         | <b>.44</b>  | <b>.34-.57</b>   | 1.12        | .86-1.46         |
| Hispanic               | <b>.56</b>  | <b>.43-.73</b>   | <b>.43</b>  | <b>.37-.51</b>   | .94         | .79-1.12         |

Note: PTSD = post-traumatic stress disorder; MDD = major depressive disorder; AUD = alcohol-use disorder; Ref = reference group; NH = non-Hispanic; AOR = adjusted odds ratio (controlling for age, gender, race/ethnicity) indicating odds of ever receiving treatment for a given disorder.

Supplemental Table 3. Likelihood of reporting a negative time to treatment predicted by veteran status and demographic variables

| Predictor             | PTSD |          | MDD  |          | AUD         |                  |
|-----------------------|------|----------|------|----------|-------------|------------------|
|                       | AHR  | 95% CI   | AHR  | 95% CI   | AHR         | 95% CI           |
| <b>Veteran status</b> |      |          |      |          |             |                  |
| Post-9/11 veteran     | Ref  |          | Ref  |          | Ref         |                  |
| Civilian              | .80  | .27-2.36 | 1.59 | .67-3.77 | .86         | .37-2.04         |
| Pre-9/11 veteran      | .96  | .23-3.91 | 1.89 | .74-4.80 | .85         | .33-2.20         |
| <b>Male gender</b>    | .71  | .41-1.23 | .85  | .68-1.06 | 1.07        | .80-1.43         |
| <b>Age</b>            |      |          |      |          |             |                  |
| 18-29                 | Ref  |          | Ref  |          | Ref         |                  |
| 30-44                 | 1.35 | .64-2.84 | .96  | .72-1.29 | .85         | .58-1.25         |
| 45-64                 | .98  | .46-2.10 | 1.12 | .84-1.49 | <b>.67</b>  | <b>.46-.97</b>   |
| 65+                   | 1.15 | .34-3.89 | .88  | .61-1.26 | <b>.23</b>  | <b>.12-.45</b>   |
| <b>Race/ethnicity</b> |      |          |      |          |             |                  |
| White, NH             | Ref  |          | Ref  |          | Ref         |                  |
| Black, NH             | .87  | .43-1.75 | 1.11 | .83-1.47 | <b>1.44</b> | <b>1.03-2.00</b> |
| Other, NH             | 2.00 | .73-5.50 | .98  | .67-1.43 | <b>.50</b>  | <b>.27-.93</b>   |
| Hispanic              | 1.28 | .69-2.37 | .86  | .66-1.12 | 1.22        | .85-1.76         |

Note: PTSD = post-traumatic stress disorder; MDD = major depressive disorder; AUD = alcohol-use disorder; Ref = reference group; NH = non-Hispanic; AHR = adjusted hazard ratio (controlling for age, gender, race/ethnicity).

Supplemental Table 4. Cox proportional hazard models predicting treatment delay with five-level veteran status variable including past year VHA/TRICARE coverage

| Predictor                           | PTSD ( <i>n</i> = 2,159) |                  | MDD ( <i>n</i> = 6,659) |                  | AUD ( <i>n</i> = 9,292) |                  |
|-------------------------------------|--------------------------|------------------|-------------------------|------------------|-------------------------|------------------|
|                                     | AHR                      | 95% CI           | AHR                     | 95% CI           | AHR                     | 95% CI           |
| <b>Veteran status X VHA/TRICARE</b> |                          |                  |                         |                  |                         |                  |
| <b>Specification 1</b>              |                          |                  |                         |                  |                         |                  |
| Post-9/11 veteran VHA/TRICARE       | Ref                      | Ref              | Ref                     | Ref              | Ref                     | Ref              |
| Civilian                            | <b>.59</b>               | <b>.43-.81</b>   | <b>.53</b>              | <b>.40-.70</b>   | 1.03                    | .61-1.73         |
| Pre-9/11 veteran no VHA/TRICARE     | .69                      | .44-1.08         | <b>.56</b>              | <b>.40-.78</b>   | .95                     | .54-1.67         |
| Pre-9/11 veteran VHA/TRICARE        | .66                      | .41-1.05         | <b>.64</b>              | <b>.45-.91</b>   | 1.15                    | .64-2.07         |
| Post-9/11 veteran no VHA/TRICARE    | .95                      | .61-1.49         | <b>.56</b>              | <b>.35-.90</b>   | .66                     | .28-1.58         |
| <b>Specification 2</b>              |                          |                  |                         |                  |                         |                  |
| <b>Civilian</b>                     | Ref                      | Ref              | Ref                     | Ref              | Ref                     | Ref              |
| Pre-9/11 veteran no VHA/TRICARE     | 1.17                     | .82-1.68         | 1.05                    | .86-1.28         | .92                     | .72-1.17         |
| Pre-9/11 veteran VHA/TRICARE        | 1.12                     | .77-1.64         | 1.21                    | .98-1.50         | 1.12                    | .83-1.50         |
| Post-9/11 veteran no VHA/TRICARE    | <b>1.62</b>              | <b>1.16-2.27</b> | 1.06                    | .72-1.56         | .64                     | .32-1.30         |
| Post-9/11 veteran VHA/TRICARE       | <b>1.70</b>              | <b>1.24-2.34</b> | <b>1.89</b>             | <b>1.43-2.49</b> | .97                     | .58-1.63         |
| <b>Male gender</b>                  | .92                      | .79-1.08         | <b>.71</b>              | <b>.66-.76</b>   | <b>1.36</b>             | <b>1.19-1.55</b> |
| <b>Age</b>                          |                          |                  |                         |                  |                         |                  |
| 18-29                               | Ref                      | Ref              | Ref                     | Ref              | Ref                     | Ref              |
| 30-44                               | .89                      | .76-1.05         | 1.07                    | .99-1.16         | .87                     | .71-1.06         |
| 45-64                               | <b>.71</b>               | <b>.60-.85</b>   | <b>.89</b>              | <b>.82-.97</b>   | .96                     | .79-1.17         |
| 65+                                 | <b>.38</b>               | <b>.28-.52</b>   | <b>.69</b>              | <b>.61-.79</b>   | <b>.77</b>              | <b>.58-1.02</b>  |
| <b>Race/ethnicity</b>               |                          |                  |                         |                  |                         |                  |
| White, NH                           | Ref                      | Ref              | Ref                     | Ref              | Ref                     | Ref              |
| Black, NH                           | <b>.73</b>               | <b>.61-.86</b>   | <b>.65</b>              | <b>.59-.72</b>   | 1.14                    | .96-1.36         |
| Other, NH                           | .81                      | .62-1.06         | <b>.68</b>              | <b>.59-.79</b>   | <b>1.42</b>             | <b>1.10-1.81</b> |
| Hispanic                            | <b>.73</b>               | <b>.61-.87</b>   | <b>.68</b>              | <b>.62-.74</b>   | 1.04                    | .88-1.24         |

Note: PTSD = post-traumatic stress disorder; MDD = major depressive disorder; AUD = alcohol-use disorder; Ref = reference group; NH = non-Hispanic; AHR = adjusted hazard ratio (controlling for age, gender, race/ethnicity). Table displays results from models using either post-9/11 veterans with past year VHA/TRICARE coverage or civilians as reference group.
